# Supplementary material for: Increased CXCR3 Expression of Infiltrating Plasma Cells in Hunner Type Interstitial Cystitis
Source: PubMed Central journal article supplement (PMC4919639; doi:10.1038/srep28652), 2016-06-24
Supplement: srep28652-s1.pdf [file srep28652-s1.pdf]

Supplementary Information

Increased CXCR3 Expression of Infiltrating Plasma Cells in Hunner Type Interstitial Cystitis

Yoshiyuki Akiyama<sup>1, 4</sup>, Teppei Morikawa<sup>2</sup>, Daichi Maeda<sup>3</sup>, Yukako Shintani<sup>2</sup>, Aya Niimi<sup>1</sup>, Akira Nomiya<sup>5</sup>, Atsuhito Nakayama<sup>2</sup>, Yasuhiko Igawa<sup>4</sup>, Masashi Fukayama<sup>2</sup> and Yukio Homma<sup>1</sup>

<sup>1</sup> Department of Urology, Graduate School of Medicine, The University of Tokyo, Tokyo, Japan

<sup>2</sup> Department of Pathology, Graduate School of Medicine, The University of Tokyo, Tokyo, Japan

<sup>3</sup> Department of Cellular and Organ Pathology, Graduate School of Medicine, Akita University, Akita, Japan

<sup>4</sup> Department of Continence Medicine, Graduate School of Medicine, The University of Tokyo, Tokyo, Japan

<sup>5</sup> Department of Urology, Mitsui Memorial Hospital, Tokyo, Japan

Supplementary Table S1. Demographics and cell density in non-IC cystitis group associated with or without bladder cancer

|                                               | <b>Associated with bladder cancer</b> | <b>Associated without bladder cancer</b> | <b><i>P</i> value</b> |
|-----------------------------------------------|---------------------------------------|------------------------------------------|-----------------------|
|                                               | (N = 8, n = 12)                       | (N = 7, n = 11)                          |                       |
| No. (male / female)                           | 8 (5 / 3)                             | 7 (3 / 4)                                | 0.62                  |
| Mean age at the time of biopsy (years)        | 73.8 ± 10.8 [54 – 85]†                | 71.0 ± 9.5 [57 - 85]                     | 0.56                  |
| CXCR3-positive cells (n/mm <sup>2</sup> )     | 73.3 (40.7 – 152.6) ‡                 | 146.1 (12.9 – 185.9)                     | 0.78                  |
| CD3-positive cells (n/mm <sup>2</sup> )       | 698.9 (354.0 – 1199.7)                | 353.0 (178.0 – 705.0)                    | 0.07                  |
| CD20-positive cells (n/mm <sup>2</sup> )      | 208.8 (112.0 – 366.1)                 | 162.6 (23.3 – 250.0)                     | 0.41                  |
| CD138-positive cells (n/mm <sup>2</sup> )     | 56.8 (16.4 – 124.8)                   | 49.0 (29.0 – 107.0)                      | 1.00                  |
| Lymphoplasmacytic cells¶ (n/mm <sup>2</sup> ) | 1066.1 (582.5 – 1627.1)               | 530.9 (348.4 – 1462.7)                   | 0.09                  |

† ‡ Values are expressed as mean ± SD [range] for age, or median (interquartile range) for cell numbers.

¶ Lymphoplasmacytic cells: Sum of the CD3-positive cells, CD20-positive cells and CD138-positive cells

Supplementary Table S2. Correlations among cell numbers in non-IC cystitis group associated with or without bladder cancer

| (cells/mm <sup>2</sup> )    | CXCR3-positive cells |                       | CD3-positive T cells    |                       | CD20-positive B cells |                       | CD138-positive plasma cells |                       | Lymphoplasmacytic cells‡ |                        |
|-----------------------------|----------------------|-----------------------|-------------------------|-----------------------|-----------------------|-----------------------|-----------------------------|-----------------------|--------------------------|------------------------|
|                             | Associated with BC†  | Associated without BC | Associated with BC      | Associated without BC | Associated with BC    | Associated without BC | Associated with BC          | Associated without BC | Associated with BC       | Associated without BC  |
| CXCR3-positive cells        |                      |                       | <b>0.56</b> ¶<br>(0.05) | <b>0.55</b><br>(0.04) | 0.32<br>(0.31)        | 0.35<br>(0.08)        | 0.07<br>(0.81)              | -0.11<br>(0.75)       | <b>0.60</b><br>(0.04)    | 0.58<br>(0.06)         |
| CD3-positive cells          |                      |                       |                         |                       | 0.50<br>(0.10)        | <b>0.61</b><br>(0.04) | 0.34<br>(0.28)              | -0.08<br>(0.81)       | <b>0.97</b><br>(<0.01)   | <b>0.93</b><br>(<0.01) |
| CD20-positive B cells       |                      |                       |                         |                       |                       |                       | <b>0.63</b><br>(0.03)       | -0.25<br>(0.45)       | <b>0.64</b><br>(0.02)    | <b>0.77</b><br>(<0.01) |
| Cd138-positive plasma cells |                      |                       |                         |                       |                       |                       |                             |                       | 0.39<br>(0.20)           | -0.04<br>(0.92)        |

†Number of samples: 12 for patients with bladder cancer (BC), 11 for patients without BC

‡Lymphoplasmacytic cells: Sum of the CD3-positive cells, CD20-positive cells and CD138-positive cells

¶Spearman's correlation coefficient  $\rho$  and  $P$ -value (in parentheses), bold when  $P < 0.05$
